# Supplementary material for: Construction of a Tomato (Solanum lycopersicum L.) Introgression Line Population and Mapping of Major Agronomic Quantitative Trait Loci
Source: MDPI journal article supplement (doi:10.3390/horticulturae9070823), 2023-07-18
Supplement: s1 [file s1]

**Table S1** Primer sequences of the markers used to confirm polymorphism in the current study.

| Marker         | Primer Sequence              |
|----------------|------------------------------|
| T0801-F        | GAGCCGGAAGGTATGATTGA         |
| T0801-R        | GACCTTGTGGTAGGGCATGT         |
| U153274-F      | GCGAGGATAACGGTGAGAAG         |
| U153274-R      | TGCCTTTGGAGACTCCTTGT         |
| C2_At1g47830-F | TTGTGAATAGAGATCCCAAATTCACC   |
| C2_At1g47830-R | TCCTGCATATCTTCTGTATATTACCTTG |
| TG130-F        | CGGAACCCACTTTGTTTTTC         |
| TG130-R        | ATCAACCCTGCAAGCTCAAC         |
| C2_At2g32970-F | TCTGTGGGAAAGTACGTATGCTCC     |
| C2_At2g32970-R | TCTGTTGCAGGCTGTGAAAAATGC     |
| C2_At3g14910-F | TCTCCGTGGTGATCTGATTCATAAAC   |
| C2_At3g14910-R | AATCTAAGAATCTTCCAGGGCTTAC    |
| C2_At5g51700-F | AGATGCCACCAGGGATTCTTTTG      |
| C2_At5g51700-R | AGCAGTGTCTGATTTTCCTTTTC      |
| T1480-F        | ACCACCTTGGATGAATACCG         |
| T1480-R        | TGCAACAGCTTTTCCCTCTC         |
| C2_At5g46630-F | TGGCGCCTTTGATGAAGATGC        |
| C2_At5g46630-R | AGATTTTGAGGGTAACCAAAGTCC     |
| C2_At2g25950-F | TGGTGGTGCTGATGGAACAAGTCC     |
| C2_At2g25950-R | TCGCTTGATAGATTGAGCATCTG      |
| TG294-F        | ATTGGCTGCAATGATGGATT         |
| TG294-R        | CTAAGCAGGACGGCCATCTA         |
| C2_At4g04930-F | TACAGATGAACCTCATGCTTCTCGTAG  |
| C2_At4g04930-R | ATTCCATCAACTCCTTGAAGCG       |
| TG233-F        | CATGCCTTTTCTTGGGATG          |
| TG233-R        | TGGAACCCCTTTAACTGTGC         |
| C2_At5g42740-F | AGCACCATTGAGAAAAATATACCTG    |
| C2_At5g42740-R | ATCCAAGGAATGAAACATTCCACAC    |
| C2_At2g14260-F | AGGATCTATACCCCTCTATAGAGCC    |
| C2_At2g14260-R | TTATTGGGTGAAGTCCACCTCC       |
| C2_At2g32950-F | ATATATGCTGTGAAAATATAATCCTGG  |
| C2_At2g32950-R | TGGCTGGTGTTCTCAAGTCATAATAATG |
| C2_At1g71810-F | TCATGCAGATCCACATCCTGAAAC     |
| C2_At1g71810-R | AGTGACAAAATCCTTGGCCAATGC     |
| C2_At3g06580-F | TGCTCAACTCACATGTGAGTGTGAAAG  |
| C2_At3g06580-R | AGCAAACCCAGATTTTGCCATAAC     |
| C2_At2g47210-F | TCCACTTTGGCTTCTCTTCGC        |
| C2_At2g47210-R | ACCCCAAGGTCTTGTAAGTTTG       |
| C2_At4g00090-F | AGATATTGGCCACCACTCATGGTTC    |
| C2_At4g00090-R | AGGCGACCATGCCATGTCCG         |
| U223116-F      | TCACTTCAATCTTCACTTCTCTCTCC   |
| U223116-R      | TGTCCAGTTTCTTAAACTTCACATTC   |

|                |                              |
|----------------|------------------------------|
| C2_At3g12490-F | ACTGCACCACCTCACTCTTGAGGTC    |
| C2_At3g12490-R | TGGATGTATAGAGTTGGATCTCTGCTG  |
| C2_At5g63380-F | AGCAGGGGAGATTCTATGGC         |
| C2_At5g63380-R | ATCTTTCCAGCAGGAGATTTTGG      |
| C2_At1g23890-F | ATGCATGCAATTAGAAAGATTAGCAAG  |
| C2_At1g23890-R | AATCCAGGTCCATCAGCACGGC       |
| T1738-F        | GGTTGGTATGGAAGGTCTGC         |
| T1738-R        | CGGCTTCCACCAGTGATATT         |
| U168526-F      | GTGGGTCCTCCTCAAAATGA         |
| U168526-R      | GGGCAGTCCAGCAATTTAAC         |
| TG68-F         | TCCACCTAGGATGAGTTTGA         |
| TG68-R         | CATGTCAAGGGGATTGAACA         |
| C2_At1g27385-F | ACCGTGCATGATGATTCAACTAATGAG  |
| C2_At1g27385-R | AGTACCAATAGCTGTAAAGCCTCTTTC  |
| C2_At3g62940-F | ACCCGCGAGGAGATGCTTTCTAGG     |
| C2_At3g62940-R | TCTGCTCTCTGGCTGCCTCTTGTG     |
| C2_At1g10030-F | AGCTGTTAGGATGGTGGTTAATGC     |
| C2_At1g10030-R | ACTCTGTCAAGAAATGACCGAAGGC    |
| C2_At5g51970-F | ACGCGAGTTTTGACTGTGCTGG       |
| C2_At5g51970-R | TCTTCTTGAGAGAATCCAAACCTGTG   |
| TG236-F        | AGCCCAAGAAAACCACCCAAAGTG     |
| TG236-R        | GGGTCGAGAGATTACATAACGTTG     |
| C2_At2g45620-F | TATGGATCATGTGCCAATTCTTTTG    |
| C2_At2g45620-R | TCGAAGCAGCTTTGTGTAAACAACAG   |
| C2_At1g05350-F | TGAACGAACCCTAAAGCGTGAAGG     |
| C2_At1g05350-R | TCCGAACCTCAACAAGTACTCAATGTG  |
| C2_At5g62440-F | AGTTTCGTTTCCTCCGTGGAGATG     |
| C2_At5g62440-R | TCCTTTCTGATTCTGAATGACCCTTC   |
| C2_At2g01720-F | ACAAATTGGTACATGCTGGTGCTC     |
| C2_At2g01720-R | TGGCCTGTTAGACTGATATTCAAC     |
| C2_At2g37500-F | TCCTGGTGGTGTACTGCTGCAAAG     |
| C2_At2g37500-R | AGCACTCAATTACATCTTGATAACCTGC |
| T1190-F        | GCGTTCTCGTTACTGGTGCT         |
| T1190-R        | GTTGCATGGTTGACATCAGG         |
| C2_At2g38025-F | ATGGGCGCTGCATGTTTCGTG        |
| C2_At2g38025-R | ACACCTTTGTTGAAAGCCATCCC      |
| C2_At2g22570-F | ACTGAAGAGTGAGATTCCGGTGGAG    |
| C2_At2g22570-R | TCTGTTCCAGTGATACAATGAGGAGG   |
| C2_At3g44880-F | ACAAGATTGTCGTCGAAATTCTC      |
| C2_At3g44880-R | ACCACATCCATTAAATGACCATCC     |
| TG180-F        | TCTCAGTGGACTAAGGGGTCA        |
| TG180-R        | TCACAGCAGACATGTCGGAC         |
| U241700-F      | GAGAATCTCGGGTTTTCGTTAG       |
| U241700-R      | CAAGAAATCTTCCAACCTTTTCGAC    |

|                |                               |
|----------------|-------------------------------|
| TG254-F        | GACTTCGGGGCAATTATCTG          |
| TG254-R        | AAACGAGCACTGCATTTCATG         |
| TG279-F        | GTAGAATCCGCTGTGCGCTTC         |
| TG279-R        | TATGTCCACGAAGTCGGTGA          |
| C2_At5g62530-F | TTCGACTGGAAGATCCTTGGG         |
| C2_At5g62530-R | TGATTCAGCTGAACACTTCTGACC      |
| cLPT-2-E21-F   | CGAAGATGTTGCTTGATTGC          |
| cLPT-2-E21-R   | AAGCAGGAGCTGGACACAAT          |
| C2_At1g71950-F | TGAGCAACCTAAAGATCAAGAACCTG    |
| C2_At1g71950-R | TAACAATGCCTCTTTTGACGCTC       |
| C2_At3g51010-F | TCCAAACAATCCCAATGAAGGAAG      |
| C2_At3g51010-R | ACGCTCTACTCGCTTAATCATTTTC     |
| U221657-F      | AGGTTTCAATGGTGGAGCAC          |
| U221657-R      | ACAGCTGCTCGTTTCAGACC          |
| U213360-F      | ATCAATTGCGGTGTGTGCATGG        |
| U213360-R      | ACCAATCCTGCATATCCCACAACC      |
| T1682-F        | CCTCCCTCACCATCCAATTA          |
| T1682-R        | CTGCTTTAACCACCGGATTC          |
| C2_At1g60640-F | TCTGACAGGGGGAAATGAATCTTC      |
| C2_At1g60640-R | ACTTCATTGAAAGAGCTATCTTCACTCTC |
| C2_At4g20410-F | TGTGGGAGGCCCAACCTGC           |
| C2_At4g20410-R | TCAGGTGCTCCATCTTCTAAAGC       |
| C2_At1g30580-F | TTCTGCCGAAGATTCATGCATGG       |
| C2_At1g30580-R | TCTCTCCACAGCAGCACTGAAAGG      |
| B-F            | CCCTTCACCACTCTCCATGT          |
| B-R            | AGAAAGGAACCCTTGCCAGT          |
| C2_At3g47990-F | AGAGAAGCAGTGGAGGCACTCATTC     |
| C2_At3g47990-R | AGAAAACCTTGCAACCTCAGCAG       |
| C2_At2g01110-F | ATTTGTGCTCGTACTCATGTTACG      |
| C2_At2g01110-R | TCCAAATCGACAGCATTTGATCTC      |
| T1601-F        | TGCAACGACGTACAATGAGG          |
| T1601-R        | GCATATTTACGAGCCGCATC          |
| C2_At1g10500-F | ACGATTCAATCATCGAGTACAATGG     |
| C2_At1g10500-R | AGCAGTAAACGATTTTCCACAACCAC    |
| TG23-F         | GGTGGTTCAAATCCTTATTGG         |
| TG23-R         | AAAGTGTGGGGTAACGCAC           |
| C2_At3g14770-F | TCAACTGAACAGTTCTCAGGGTTGCC    |
| C2_At3g14770-R | AACATTGATATCAAGGAAGCACAACCTC  |
| C2_At5g01990-F | TATTGTTGGCCTTAGGAGGCAATC      |
| C2_At5g01990-R | TGCAAACACAATCGCAACAGTTGTC     |
| C2_At5g19690-F | AGAGAGGCTTATGCATGGTTGAGC      |
| C2_At5g19690-R | TAGTTTGATAGCCATAGTCCCACC      |
| C2_At4g18593-F | AGGTGATTGTTATAATCGTGAGAAAG    |
| C2_At4g18593-R | TTCAATGCGCACATAAAAGCTTG       |

|                |                             |
|----------------|-----------------------------|
| C2_At4g16580-F | TGTTACCTGCCTCATCCTGATAAAG   |
| C2_At4g16580-R | ATTTTGAAGACCTCTCCAGAACTTGG  |
| C2_At4g05090-F | AGTATTATAGCGAGCTCGAAGCTGC   |
| C2_At4g05090-R | TCCTTTCCCCCTCTGTCAATTGC     |
| C2_At4g15790-F | ATTGACTGAGTCAAGGCAAGAGCTGC  |
| C2_At4g15790-R | TAAGTTTCTTAAGCTGTTGGTAACATC |
| U221402-F      | AAGCCTCCTTGACAAATGCATATAG   |
| U221402-R      | AGATATAGCTACAGTGGCAGCTTCATC |
| T1519-F        | TGCACAGACACAAACTGCAA        |
| T1519-R        | CACCCTGGTAATGCCAAACT        |
| C2_At4g20070-F | ACCTAGAGAGGACCTTCCAGAGCCC   |
| C2_At4g20070-R | AGGAATTCAGTGCCTTCAATGCAG    |
| C2_At2g04700-F | ATGAGAACTCTTCAAGCTTCCACCTC  |
| C2_At2g04700-R | ATGAGAACTCTTCAAGCTTCCACCTC  |
| C2_At4g21710-F | TGACGGGCTCAGATTTGTTAAAGTG   |
| C2_At4g21710-R | TCTTGTCATCAACCATATGCTTCAGC  |
| C2_At3g16150-F | AAGCAACTCCTTACTCGTTGCC      |
| C2_At3g16150-R | TGGAGATACCAGAAACGGCG        |
| C2_At1g07080-R | TGTAAGCTTTGCAAATGTAGCTTATG  |
| C2_At1g07080-F | TTGTGCCATGGGTGTGTGTTGATG    |
| C2_At3g10920-F | TGGCTTGGTGTGGACAAAGAGC      |
| C2_At3g10920-R | TGCAAGTAGTATGCGTGTTCCTC     |
| C2_At3g11210-F | AGGCCTGTATAGAGCTATGCAAAGAG  |
| C2_At3g11210-R | AATTCTGTTGCCATTGATTCCAGTG   |
| C2_At4g28530-F | TGGAAATTGATCTTCACACTTGTGAGC |
| C2_At4g28530-R | TCAAGTCGAAATTCATGCATGATCC   |
| C2_At4g15520-F | TCCGTTTCCGCCACTTCCAC        |
| C2_At4g15520-R | ATTCAATGAAGCAGTACCACACCC    |
| U213330-F      | TCATCATGATCAAGCCTGATGGTGTC  |
| U213330-R      | AGAGAATCCTTTCTTCTCAAATCTGC  |
| U288441-F      | ATGTTGGCAAAAGGTAGAAGAGTTG   |
| U288441-R      | CTTTACTCTTTAGGAGCGGAATCTC   |
| TG585-F        | TGGAAAGCCAGACACACAGA        |
| TG585-R        | CAGGGGTATCAGTAGGCAGTG       |
| T1388-F        | GCGATTTGGCTATCTGGGTA        |
| T1388-R        | AACCGAAAGGCTTTTCCAAG        |
| C2_At3g10220-F | TGGCTTCTCAGTTACAGATTCAAGG   |
| C2_At3g10220-R | AACCTCCGGAGGTCACTGACG       |
| C2_At1g80360-F | ATGGTTACTGCCGGTGCAAATCAG    |
| C2_At1g80360-R | TCGGTAACACCTGTCATCTGGAATG   |
| C2_At1g60440-F | TGCCCCGTCCCTCTTAAGGATG      |
| C2_At1g60440-R | TCCGCTTGAGCCCCAAAACGAAG     |
| C2_At1g14300-F | AGGCGCTAGAGGCTATTTATTTGC    |
| C2_At1g14300-R | TCACTGACCAAAATGCTCTTCTGCC   |

|                  |                             |
|------------------|-----------------------------|
| C2_At2g03510-F   | TGATACCCTGCTGAATTATGGGGTC   |
| C2_At2g03510-R   | TGGTGCGCTCCTGTTCATGTTCTC    |
| C2_At2g18710-F   | TAAAAGCACAGCGGCATTTCATC     |
| C2_At2g18710-R   | AGAACCAAGAACTGATATCCGGC     |
| C2_At5g20180-F   | TGCTATGTACATCTAATCCCAAGCAC  |
| C2_At5g20180-R   | AGCTATCCCCCTTTCCACCAAG      |
| C2_At2g47580-F   | TAGCGGCGGCGAAGTTCCAC        |
| C2_At2g47580-R   | ATCAAACACTACCCACGCCTGTCC    |
| C2_At2g32600-F   | TGAAGGGAATTACTTGGCTCACAC    |
| C2_At2g32600-R   | TGTTTTGTTTCCGGATCAAATTGC    |
| C2_At5g20890-F   | AACTTATCGAGGAGATCATGATTGG   |
| C2_At5g20890-R   | AGCTGAGCAATCAGCTCAGCACTGTC  |
| C2_At4g32930-F   | TCCTCTTCCTATTGGCAAGGGC      |
| C2_At4g32930-R   | TGGACACTCCCCCTTTTCATCATAC   |
| C2_At1g48300-F   | AAGAAGATGAAATTACTTAAGGGTTTG |
| C2_At1g48300-R   | TTTAGTGTGCATTCTCAAGTGCTCG   |
| C2_At1g76080-F   | TAGTATGGAGGAATTGGATGAAGC    |
| C2_At1g76080-R   | TCTTCTCTGCTGTGGAGCTGCAC     |
| C2_At2g43770-F   | AATGGAGTTGTCTGTTGTGCTTCC    |
| C2_At2g43770-R   | TGGCGCATATCCCAAAGTTAGC      |
| C2_At4g10050-F   | ATCACCTTCTGCCTTTTCTTC       |
| C2_At4g10050-R   | ATCTGGGATCTGAATGTCATCCTC    |
| U219928-F        | AACATCTAGGGGATGTGATTGGTG    |
| U219928-R        | AAGCTGGTTTTGAATGTGTGAGG     |
| C2_At5g66530-F   | TTCAGGAATGGCATTGCAAGTGTG    |
| C2_At5g66530 - R | ACCATTGAATACAGCATCTGGTCGAAC |
| C2_At5g56940-F   | TAGCAGATCTCCGAGAGACGGC      |
| C2_At5g56940-R   | TACTTCAACCTATCAAAATTAAGACC  |
| C2_At4g09010-F   | TAAGGGGCTTGATGCTGCTTTG      |
| C2_At4g09010-R   | TAAAGGTCGATTTGACTGCACTTTG   |
| C2_At4g27700-F   | AGCTACTAAACCTGCTAAATCACC    |
| C2_At4g27700-R   | TCGGCTTCAGGTCGTACATCAAG     |
| C2_At3g04780-F   | ACTATTGTCAATGCCCTCAAACAGG   |
| C2_At3g04780-R   | ATGCAGTTTGATGACTTGATTAAAAGG |
| C2_At1g02560-F   | TTTATCTTGATGCTGTTGATCCCAC   |
| C2_At1g02560-R   | TGACCCTCCTGGAGAATTGACATAC   |
| C2_At4g14110-F   | AGCTCCTTCTTCCGCTTATTCAAC    |
| C2_At4g14110-R   | TGGAAGACATATTCAAGCAAGCGCTG  |
| Bs4-F            | GGAGCTGAATACGGATTGGA        |
| Bs4-R            | ATCGTTCCGATGATTTCTGG        |
| C2_At4g26750-F   | AAGGATAACGAACCAGCAAAGC      |
| C2_At4g26750-R   | TTTGAGGAATCCTCAATCCTCG      |
| C2_At5g56130-F   | ACATATAGCTGTTGGGAACAGGG     |
| C2_At5g56130-R   | TAGGTTTAACTTGCGAACATCC      |

|                |                               |
|----------------|-------------------------------|
| TG18-F         | AAGGGTTGTTGATTCCGTCA          |
| TG18-R         | GCACCAGGTTTTCCATCTGT          |
| C2_At3g54470-F | TCCTGACTTTGGTTCTAAGCTTAGATCG  |
| C2_At3g54470-R | TCAAATATTAAGAAGTTGTGCTTGTCTGC |
| C2_At5g60600-F | TTGCTTCAAGGTTGCAGAATGCG       |
| C2_At5g60600-R | ACCAGGCAAGTGTGACGTCTTCTCTC    |
| C2_At3g43540-F | AGCTTACATGGCTACCACTACTTTTAC   |
| C2_At3g43540-R | AGACCAGAATCAGGCAACCCTGATG     |
| C2_At4g11560-F | TTCCAGAAGGACAACCTCAGAAGCC     |
| C2_At4g11560-R | TGTTTAATGGTATGAAGTGCACCACAC   |
| t-F            | CCTTAGGCCGTGTTGTGTTT          |
| t-R            | CCGTCAGAAAGCTTCACTCC          |
| C2_At2g06530-F | AAGGTGTCTCCCTCAGAATTCAG       |
| C2_At2g06530-R | ATCTGTCCCATTGCCTTTGTAAC       |
| PTO-F          | GTGCAGAGAGTACTGGAGGACCTG      |
| PTO-R          | GTCTGAATGAACATGATCAAAGTA      |
| T1409-F        | ATGTGATACCTCCGCCGTTA          |
| T1409-R        | TTTCTTCCATTTCCCAACCA          |
| fw2.2-F        | GCGAGAGCGAGTTGAGTGTATATC      |
| fw2.2-R        | CAGAAGAGAGAAGCTGCAAAGCAG      |
| C2_At4g37280-F | AAGAAGCAACTGGTTGATGATTGGG     |
| C2_At4g37280-R | TCCTTTTTGGATCGGTATTCAAGGTA    |
| C2_At5g67370-F | TGAAACCAGTCATTAATAATGCTGAAG   |
| C2_At5g67370-R | AGTACTGTCCACCGGCCAATGC        |
| C2_At5g37260-F | AGAGCACAAAAAGTTCCTTGAAGC      |
| C2_At5g37260-R | ACCGTACCAAATGCATCTGAACC       |
| C2_At5g53000-F | TTGCTTGAAATGCTGAAGAAAGAGG     |
| C2_At5g53000-R | AAGTAGCACAGGTGATAGGTGCTGC     |
| C2_At4g30890-F | ATGCTGATTTTACACCTGAAGCGG      |
| C2_At4g30890-R | AGCAGTAACAGAGGCATCATCAAACC    |
| U217757-F      | TCTGATGGCGTCATCTCAAA          |
| U217757-R      | TCATGGCTTTGATTGTCATC          |
| C2_At1g50020-F | TTGCTTACTCTTGGTGGAACATTC      |
| C2_At1g50020-R | TGTCTGTGATATCCTCTCTTCTTC      |
| C2_At2g15290-F | ACTGCAAGTTACTTCAAGAGATTGGG    |
| C2_At2g15290-R | TCTGGTAATAAGGATTAGTTGATGTGG   |
| C2_At1g52590-F | TGTGCAACCTGTGTAATGGAGGTGTG    |
| C2_At1g52590-R | TGAGGGAAAGGCAAGTTAATGTACTC    |
| C2_At5g13640-F | TCAGCTGAAGCACGGGATATTGC       |
| C2_At5g13640-R | TGGAACATATCCGTGTCCAGAACACC    |
| C2_At5g23880-F | AGCTAACCTAATCCTTGATACAACACC   |
| C2_At5g23880-R | ACCATCAGAACGACCTTCGAAGTCC     |
| C2_At1g07040-F | TGCTGATGATGATCAAATTTGCTATG    |
| C2_At1g07040-R | TCAACAAGAAGTTCGGATATAAATATTC  |

|                |                             |
|----------------|-----------------------------|
| C2_At4g29490-F | AAGAGCAAACCTCGACATTGCACC    |
| C2_At4g29490-R | ACAAGTAGGCGAAATAGCTCTCCTG   |
| C2_At2g42810-F | TTGCCTTCAAGTGCATGTGTCC      |
| C2_At2g42810-R | AGAGAGCTTCACGCCATCAACAC     |
| C2_At4g24820-F | TGACTGAGAAAAAACTGTTGCAGTTG  |
| C2_At4g24820-R | AGATCTGCTGCTTTCTTGAAGTTACG  |
| C2_At2g32760-F | TACATCTGCTCTTAATGAAGCTAAGC  |
| C2_At2g32760-R | TCTCTTTGACAACTTTAGAATGCATTG |
| TG497-F        | CGGAGAGTGAAGATGCATTG        |
| TG497-R        | AAGTTCCAGAGGGAGCACAA        |
| U144275-F      | ATGGCAGTTAACGGTGCTTC        |
| U144275-R      | TGCCTTCATATGTGCTGCTC        |
| C2_At5g41350-F | ACCTCCAATGCCAATGCCTTATG     |
| C2_At5g41350-R | ATGAAACTGATGCTCGCATTTTG     |
| cLET-8-K4-F    | CACTTTGTGGCAATCGACAT        |
| cLET-8-K4-R    | TGCCTTATGCCAAACAGAAA        |
| C2_At1g16180-F | TTCTTGCTTGCGTCATGCTGTGC     |
| C2_At1g16180-R | ACCAGCAAATGATTTTCATCATCC    |
| Cf5-F          | AGCAGATGAAATCCCTCGGTC       |
| Cf5-R          | CCTCGCTGCTTCTTTCTCCTT       |
| TG525-F        | TATCAGTTCACCTCCCAGCA        |
| TG525-R        | GCCAATCATGTGAATGGTGAT       |
| C2_At1g55880-F | AGAAGGCTGAAGAACCCGTTTGATAC  |
| C2_At1g55880-R | AGGAACTCCAGACCAGTTGCTGAAGG  |
| C2_At3g56040-F | TCGCTATTGGATATAATGCGTAATGC  |
| C2_At3g56040-R | AACTCAGCAACCTCTATTAGCAACTC  |
| C2_At5g38530-F | TCGACAAGCCCAACTCTGCTG       |
| C2_At5g38530-R | ACTCCTCACCATAACGGTCTGATG    |
| C2_At4g35250-F | TCCACCCTCTACGGCCACCTTG      |
| C2_At4g35250-R | TATAGGCTCCTCAGGGCGTCC       |
| C2_At4g23840-F | AGGGGAGAGAGTTATGTGGATGCAG   |
| C2_At4g23840-R | ACCATCAGCTGTGACACCTGTTTCTG  |
| Cf9-F          | CGAGTTTGCTTGCTTTAGGG        |
| Cf9-R          | TCCACGGACAACCTGTGTTA        |
| SSR156F        | CACGCCTATGCACCTTTCTT        |
| SSR156R        | CTTCAAGGCTAAACCTCCGA        |
| SSR65F         | GGCAGGAGATTGGTTGCTTA        |
| SSR65R         | TTCCTCCTGTTTCATGCATTC       |
| SSR40F         | TGCAGGTATGTCTCACACCA        |
| SSR40R         | TTGCAAGAACACCTCCCTTT        |
| SSR356F        | ACCATCGAGGCTGCATAAAG        |
| SSR356R        | AACCATCCACTGCCTCAATC        |
| SSR605F        | TGGCCGGCTTCTAGAAATAA        |
| SSR605R        | TGAAATCACCCGTGACCTTT        |

|             |                           |
|-------------|---------------------------|
| SSR5F       | TGGCCGGCTTCTAGAAATAA      |
| SSR5R       | TGAAATCACCCGTGACCTTT      |
| SSR331F     | CGCCTATCGATACCACCACT      |
| SSR331R     | ATTGATCCGTTTGGTTCTGC      |
| SSR125F     | CCTAAAGAAGATAGGAAGAAATGCC |
| SSR125R     | TCTCTCCTACTGAAACAACCAA    |
| SSR22F      | GATCGGCAGTAGGTGCTCTC      |
| SSR22R      | CAAGAAACACCCATATCCGC      |
| SSR320F     | ATGAGGCAATCTTCACCTGG      |
| SSR320R     | TTCAGCTGATAGTTCCTGCG      |
| SSR601F     | TCTGCATCTGGTGAAGCAAG      |
| SSR601R     | CTGGATTGCCTGGTTGATT       |
| SSR72F      | GGTTCCTTCTCTCTTTGTCC      |
| SSR72R      | GCGTGTCTTCGATTGACA        |
| SSR593F     | TGGCATGAACAACAACCAAT      |
| SSR593R     | AGGAAGTTGCATTAGGCCAT      |
| SSR214F     | AAATCCCAACACTTGCCAC       |
| SSR214R     | CCCACCACTATCCAAACCC       |
| SSR146F     | TATGGCCATGGCTGAACC        |
| SSR146R     | CGAACGCCACCACTATACCT      |
| SSR13F      | GGTCACATACACTCATACTAAGGA  |
| SSR13R      | CAAATCGCGACATGTGTAAGA     |
| SSR115F     | CACCCTTTATTCAGATTCCTCT    |
| SSR115R     | ATTGAGGGTATGCAACAGCC      |
| SSR49F      | TCTCAAAGTCGTTCCCTTCTGA    |
| SSR49R      | GGAAGAGAAACGCGGACATA      |
| SSRB18031F  | AGACTCAGTCCCGAACAAGTTGAAG |
| SSRB18031R  | ACATTACACTAAACCCCCAATTGCC |
| SSR128F     | GGTCCAGTTCAATCAACCGA      |
| SSR128R     | TGAAGTCGTCTCATGGTTCG      |
| SSR304F     | TCCTCCGTTGTACTCCAC        |
| SSR304R     | TTAGCACTTCCACCGATTCC      |
| SSR344F     | TGTTGCTCGAACTCTCCAAA      |
| SSR344R     | CATAGGAGAGGTAACCCGCA      |
| SSR335F     | CCTCTCCATTCTGTGGTGGT      |
| SSR335R     | AACCGTCCTCGATTTCACAC      |
| SSR594F     | TTCGTTGAAGAAGATGATGGTC    |
| SSR594R     | CAAAGAGAACAAGCATCCAAGA    |
| SSRB102358F | CTCGATCAATCTGTTCCCTTTTGTG |
| SSRB102358R | AAGCAAAATCCAGCATCATAGATCG |
| SSR85F      | ATCCGTTAGCTATTGTGCCG      |
| SSR85R      | TTGCCATGCACTTATCTTCG      |
| SSR223F     | TGGCTGCCTCTTCTCTGTTT      |
| SSR223R     | TTTCTTGAAGGGTCTTTCCC      |



|                |                                         |
|----------------|-----------------------------------------|
| SSR136F        | GAAACCGCCTCTTTCACCTTG                   |
| SSR136R        | CAGCAATGATTCCAGCGATA                    |
| SSR80F         | GGCAAATGTCAAAGGATTGG                    |
| SSR80R         | AGGGTCATGTTCTTGATTGTCA                  |
| SSR46F         | CCGAGGCGAATCTTGAATAC                    |
| SSR46R         | GCACCATCTCTTGTGCCTCT                    |
| SSR596-F       | TTCGGATAAAGCAATCCACC                    |
| SSR596-R       | TCGATTGTGTACCAACGTCC                    |
| SSR526-F       | AGGGTCCTTCGTTTGAACT                     |
| SSR526-R       | GCATTCCACTTGGAAGCAT                     |
| C2_At3g17970-F | TCAGCAAATGTATGGGTTTGTGGG                |
| C2_At3g17970-R | AGCAGGTTTCATGAGTCCTTGACCAGTC            |
| C2_At1g16870-F | ACCCTGAAGAAATGCTCCGGTC                  |
| C2_At1g16870-R | TCACCGAATTCCTTAAGCATCCC                 |
| U221455-F      | AGGCGCTTCTTATTATCTTCTC                  |
| U221455-R      | ACCACAAGCAATCATTTCTACACC                |
| TY2-F          | TGGCTCATCCTGAAGCTGATAGCGC               |
| TY2-R          | TGAT(T/G)TGATGTTCTC(T/A)TCTCT(C/A)GCCTG |
| Sw-5-2-F       | AATTAGGTTCTTGAAGCCCATCT                 |
| Sw-5-2-R       | TTCCGCATCAGCCAATAGTGT                   |
| I2-F           | GGGCTCCTAATCCGTGCTTCA                   |
| I2-R           | GGTGGAGGATCGGGTTTGTTC                   |
| TGS1138-F      | GCTGCCCTATGGTATTTTGG                    |
| TGS1138-R      | CAGGTTAGATGTATTTTCGGCA                  |
| TES324-F       | CGCTAAGCGAAGCAGTGT                      |
| TES324-R       | GAGGGTCGAGATTACCGACA                    |
| TES1955-F      | GCACAAACACTTTTGCACCA                    |
| TES1955-R      | AGGAATCGGCGTAATTTCTGA                   |
| TES2238-F      | GTTTTGGAAAGGAGCAGATCG                   |
| TES2238-R      | CTGAAGGTCATTGGTGGCTT                    |
| TGS3254-F      | GTGCAAAATCTCAAATGAAAATAGAA              |
| TGS3254-R      | AACAAGTGGAAGGAGATCAATG                  |
| TES1325-F      | GTCACAATCGTTATCACCACCA                  |
| TES1325-R      | TTGGCACCATTGAACTTATCC                   |
| TES0045-F      | ACTGGCTGGGAAGCATAAC                     |
| TES0045-R      | GCCCCAAAACATTACGTGCTT                   |
| TGS2303-F      | GTTTCCCTATTTTTCATGGCG                   |
| TGS2303-R      | CCAACGGTGTTTTCTTAAAC                    |
| TGS426-F       | CACGCCCCAAGACCTTATTA                    |
| TGS426-R       | GCATGCCTAAATCTATTAAATGCC                |
| TES1454-F      | GAAGGGTGTTCACCAACAGC                    |
| TES1454-R      | CGAGGACTCGGAAGTTTCAC                    |
| TGS738-F       | TTTCAGAACCTCAATGGGGA                    |
| TGS738-R       | GTTCCGGTCTTTTGCAATGT                    |

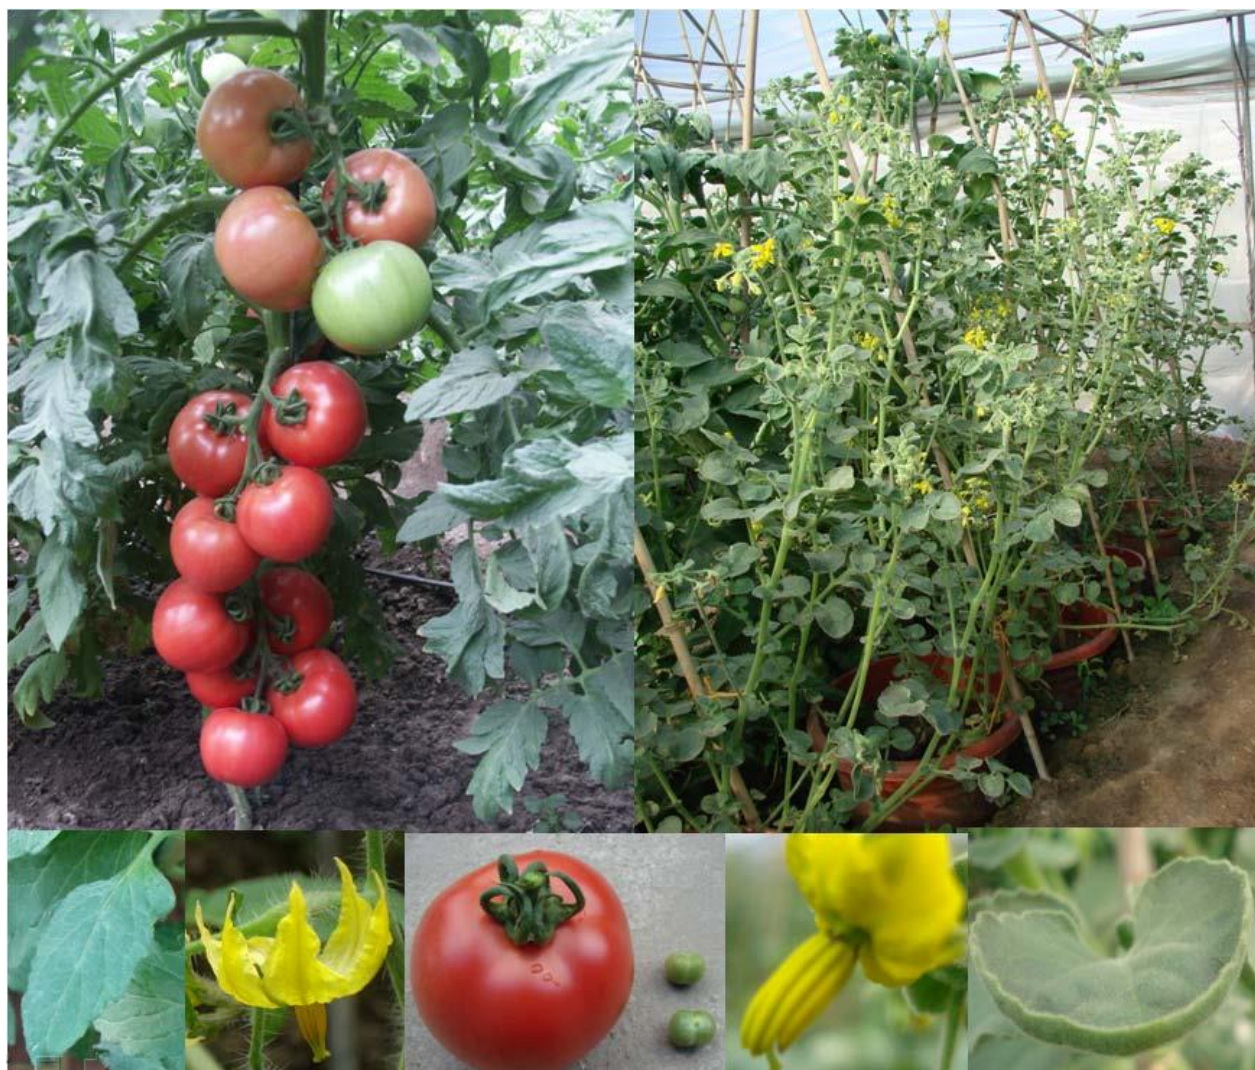

**Figure S1** Field phenotypes of *S. lycopersicum* 1052 (left) and *S. pennellii* LA0716 (right) for introgression lines construction in the current study.

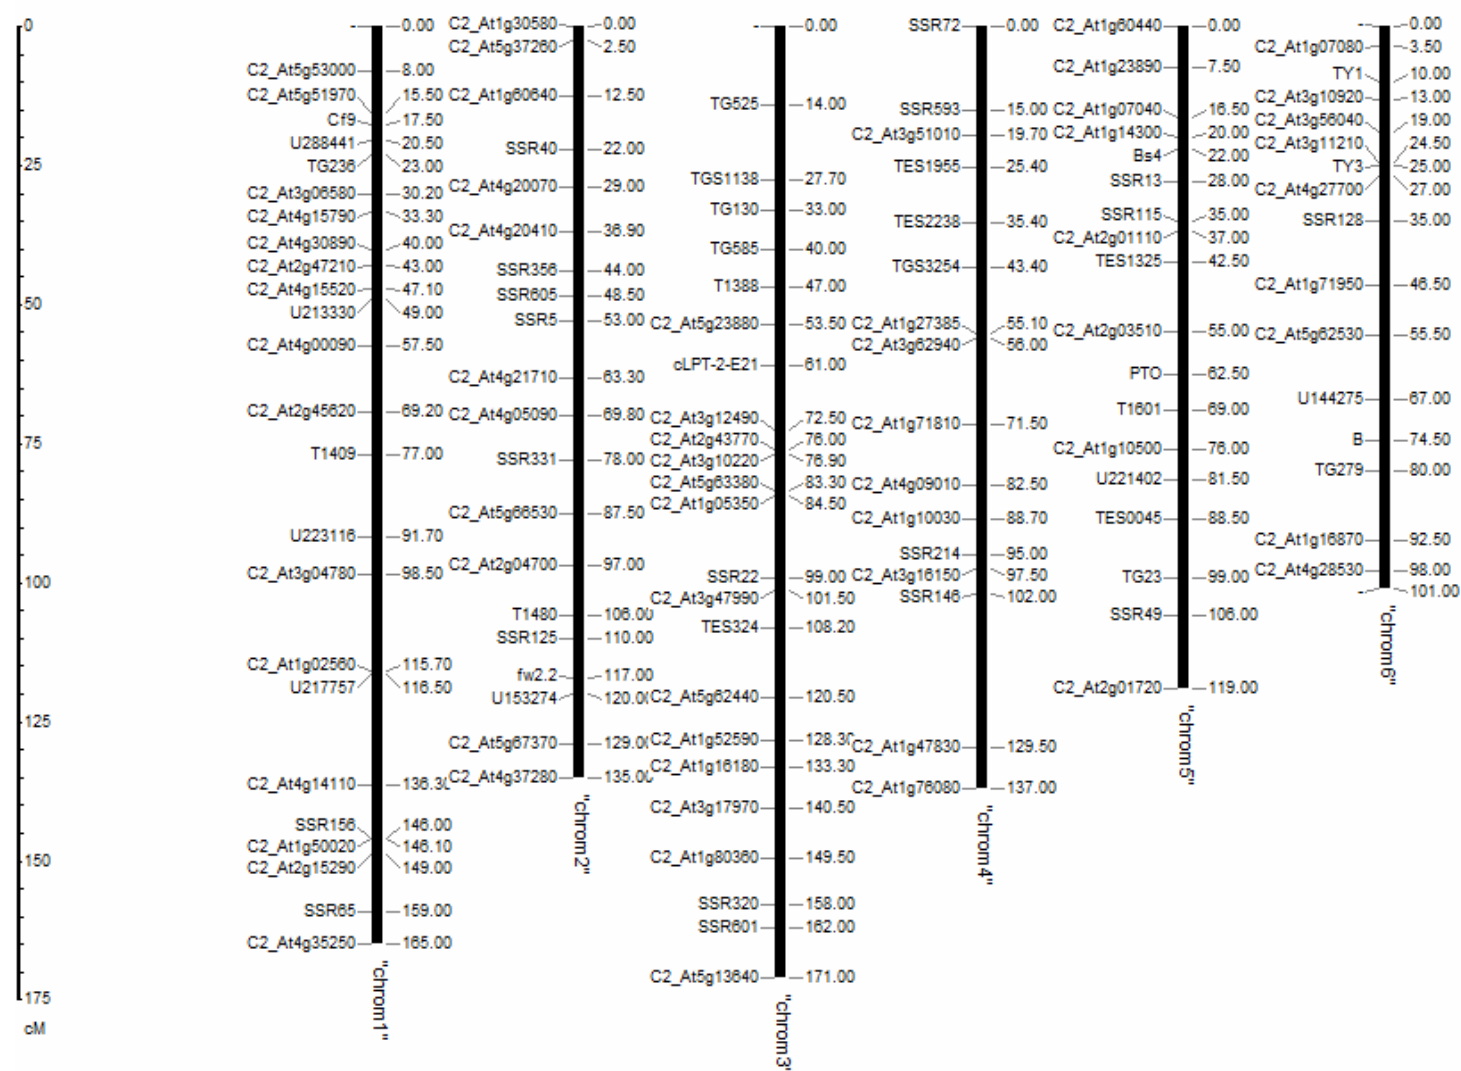

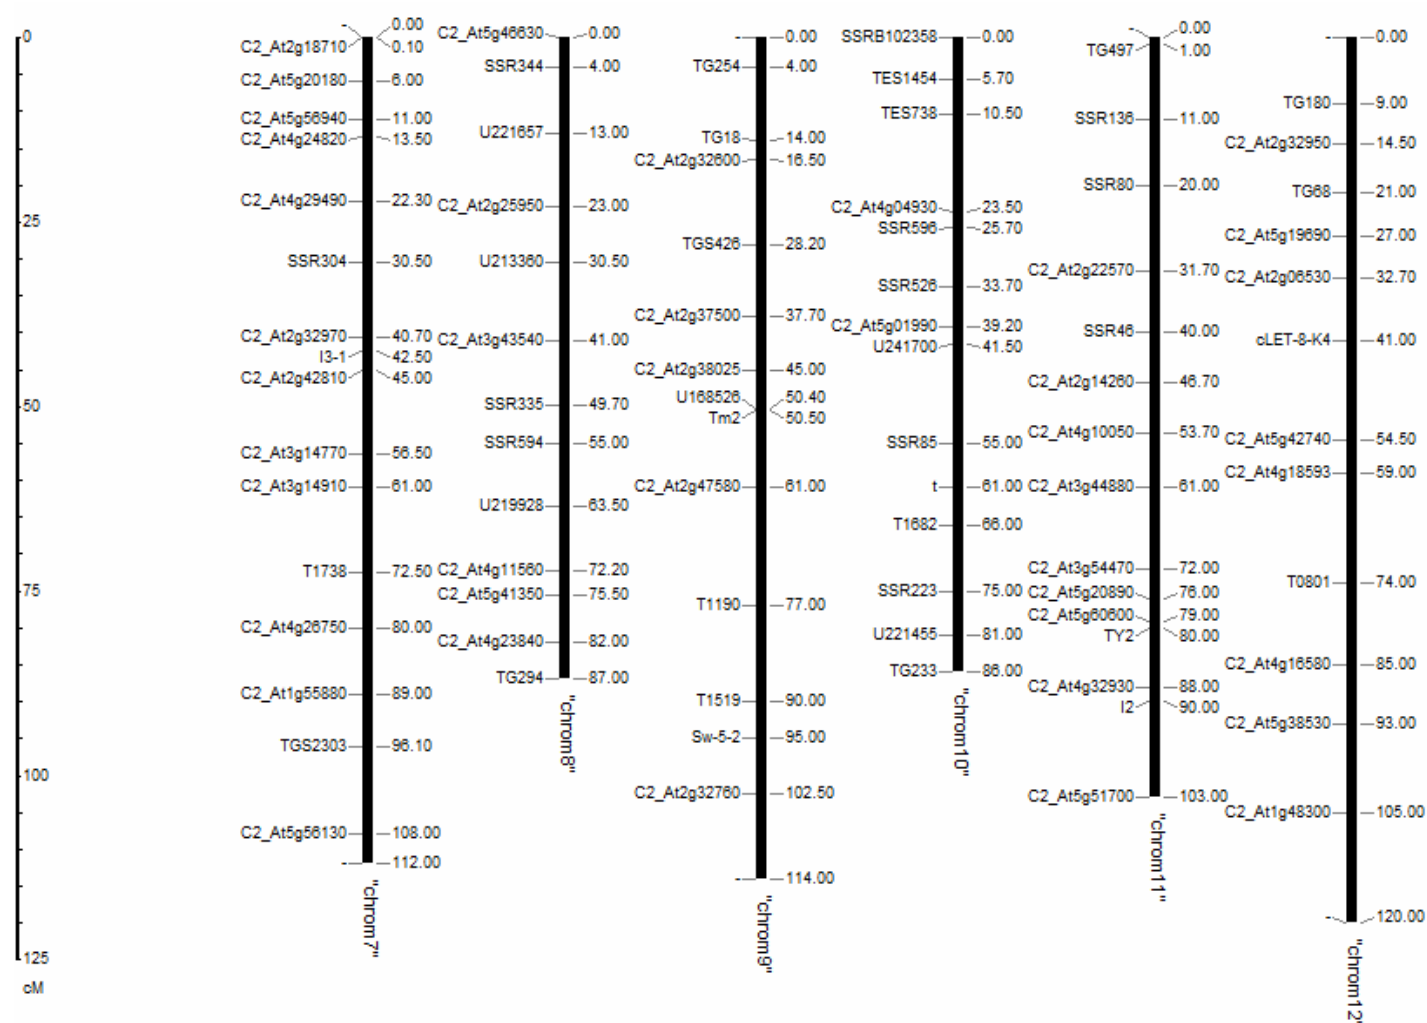

**Figure S2** Specific locations and genetic distances of the 200 selected tracking molecular markers in the 12 chromosomes of tomatoes during the introgression line population construction.

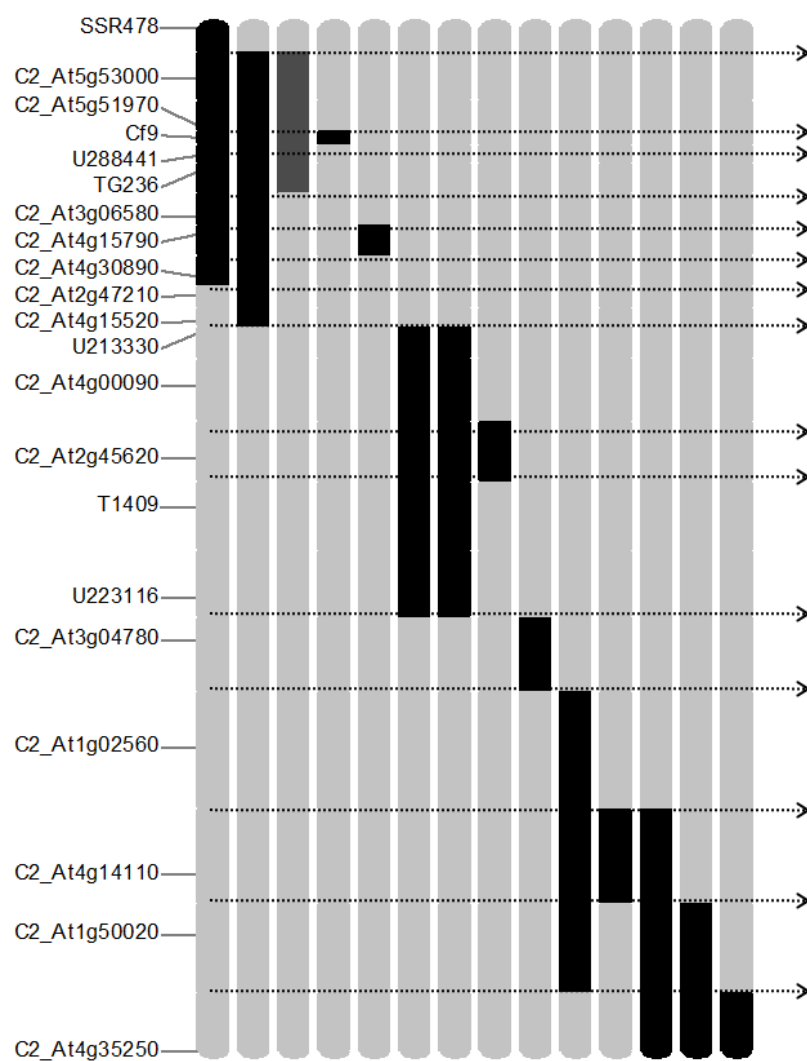

**Chromosome 1**

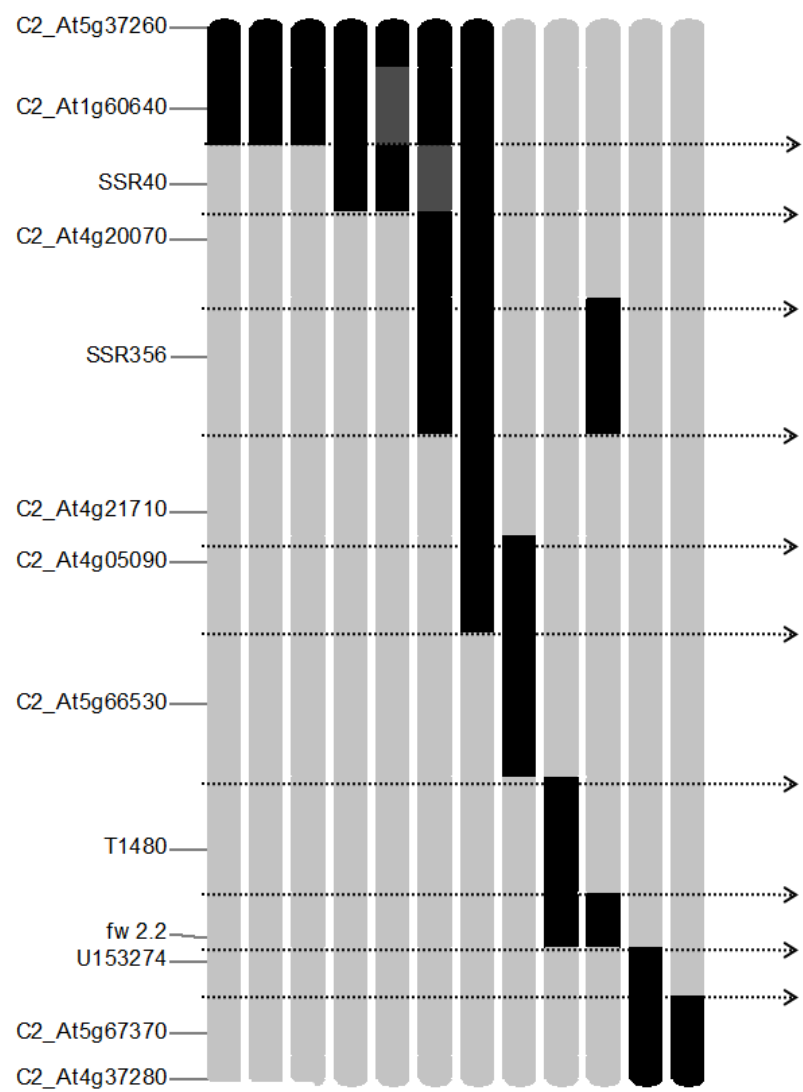

**Chromosome 2**

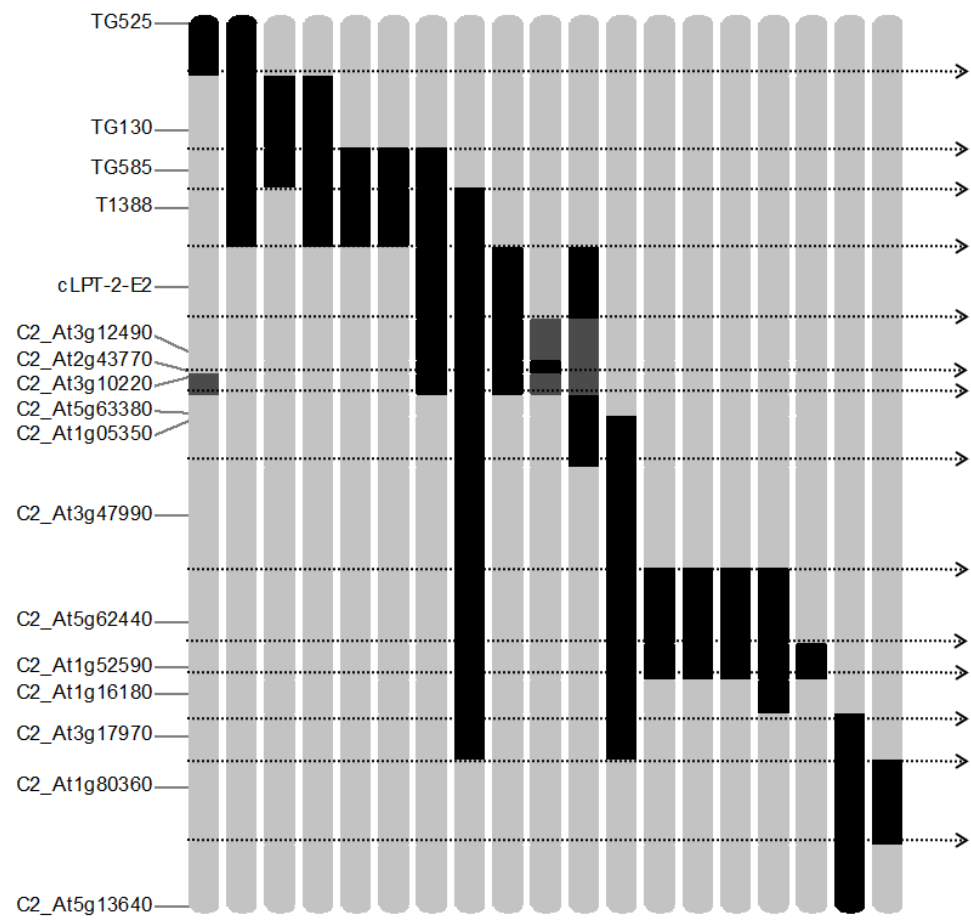

**Chromosome 3**

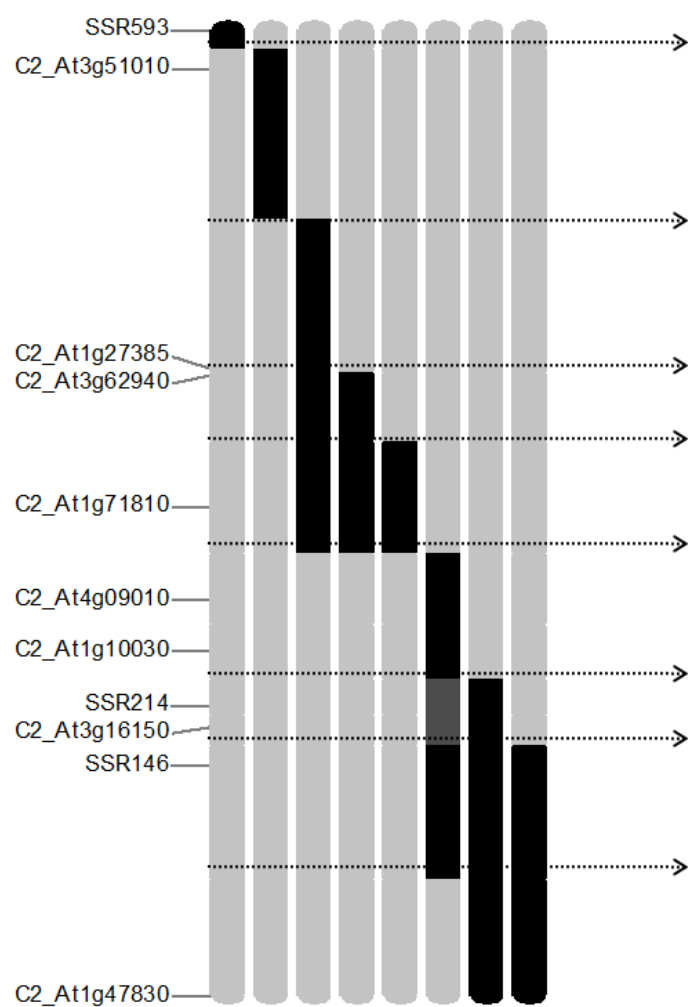

**Chromosome 4**



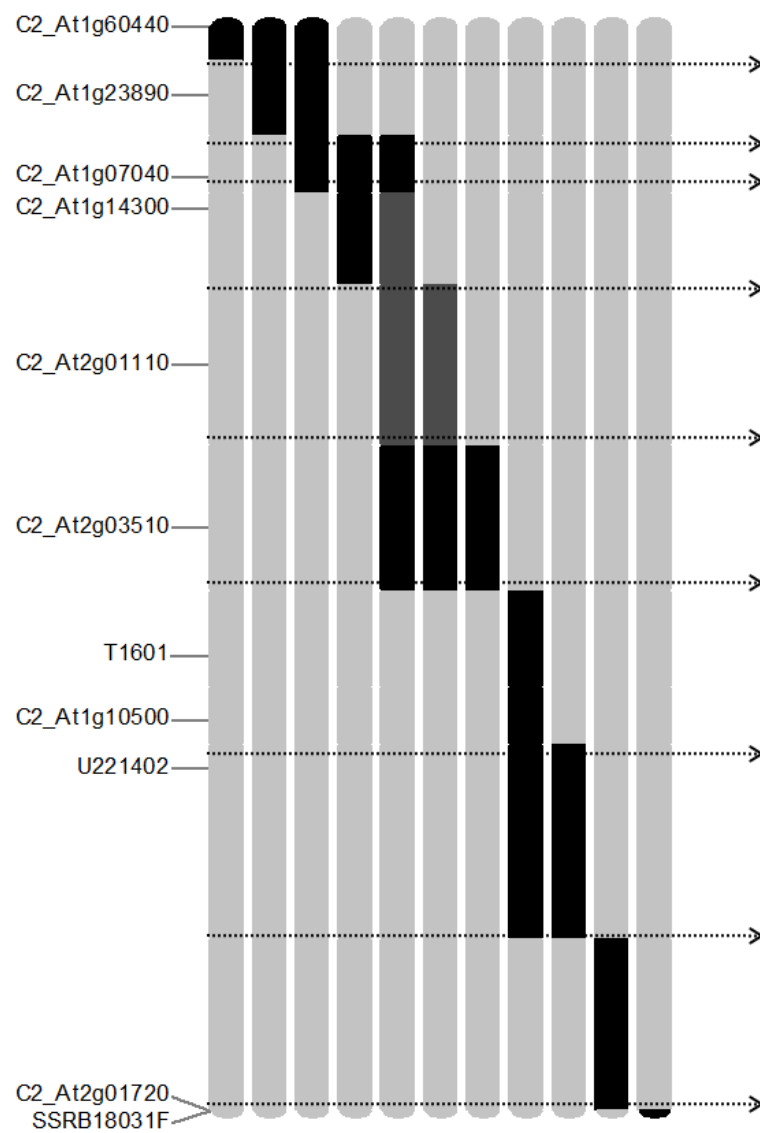

**Chromosome 5**

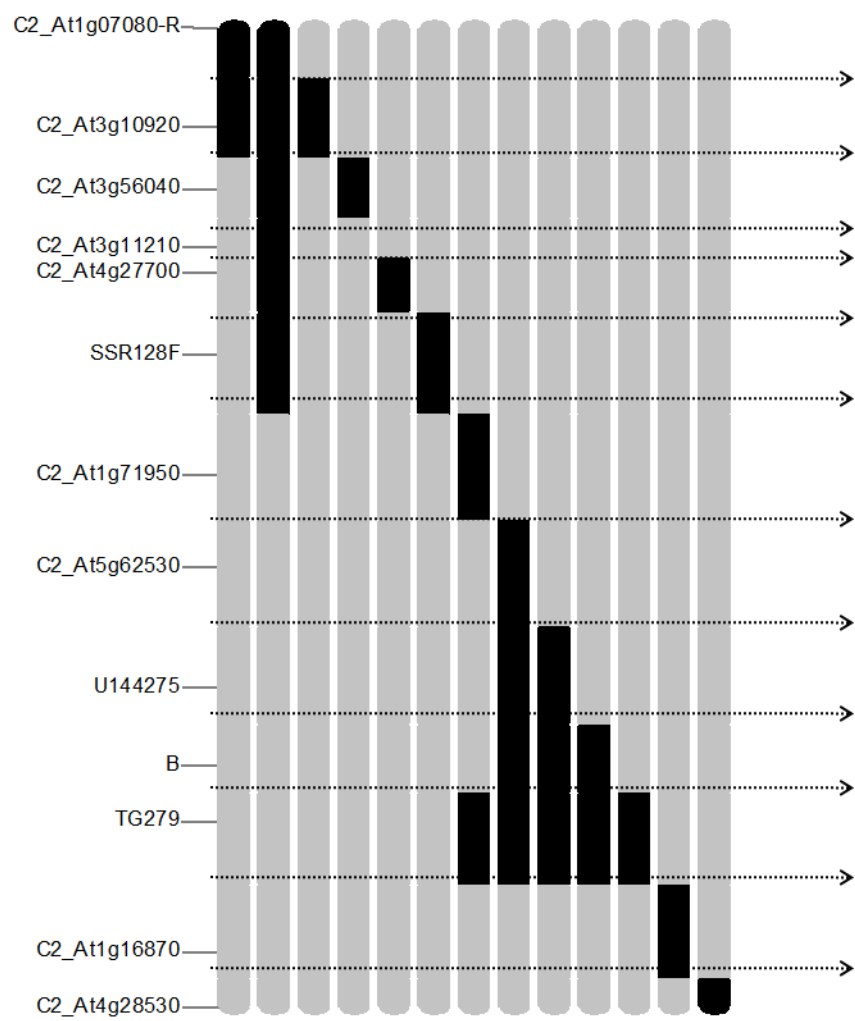

**Chromosome 6**

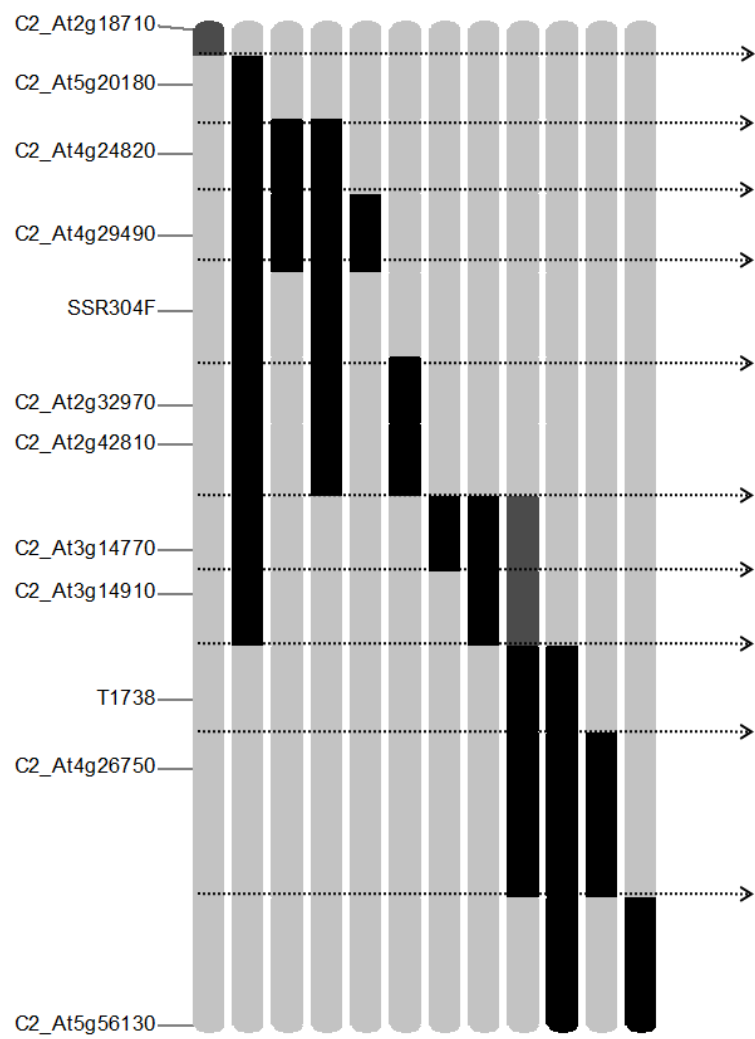

**Chromosome 7**

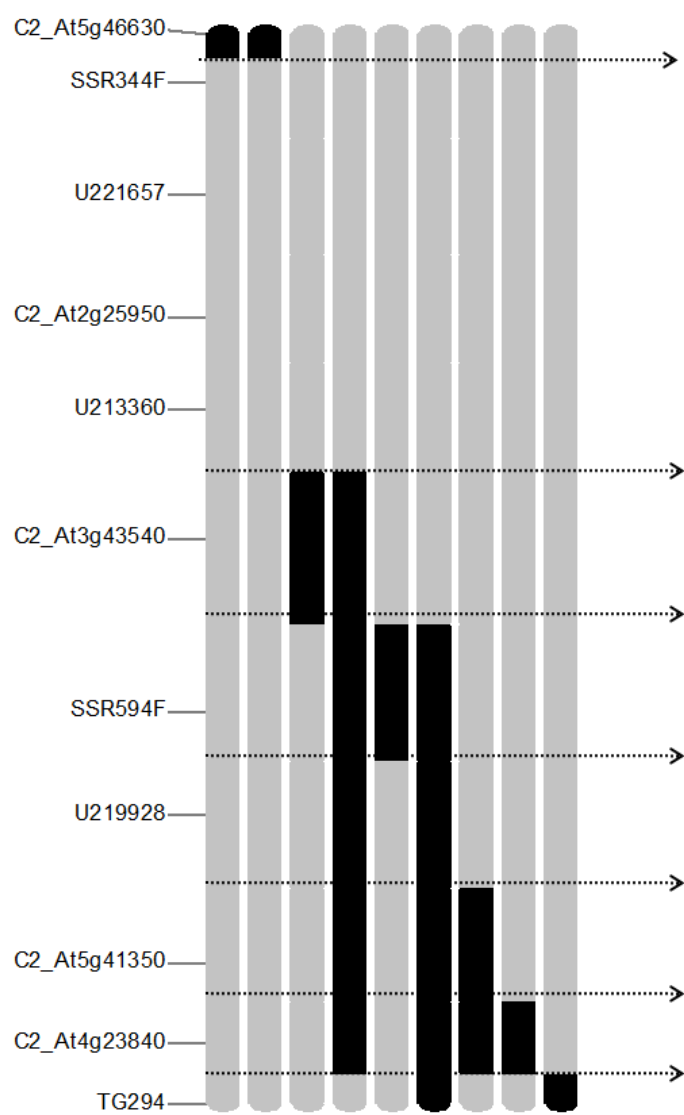

## Chromosome 8

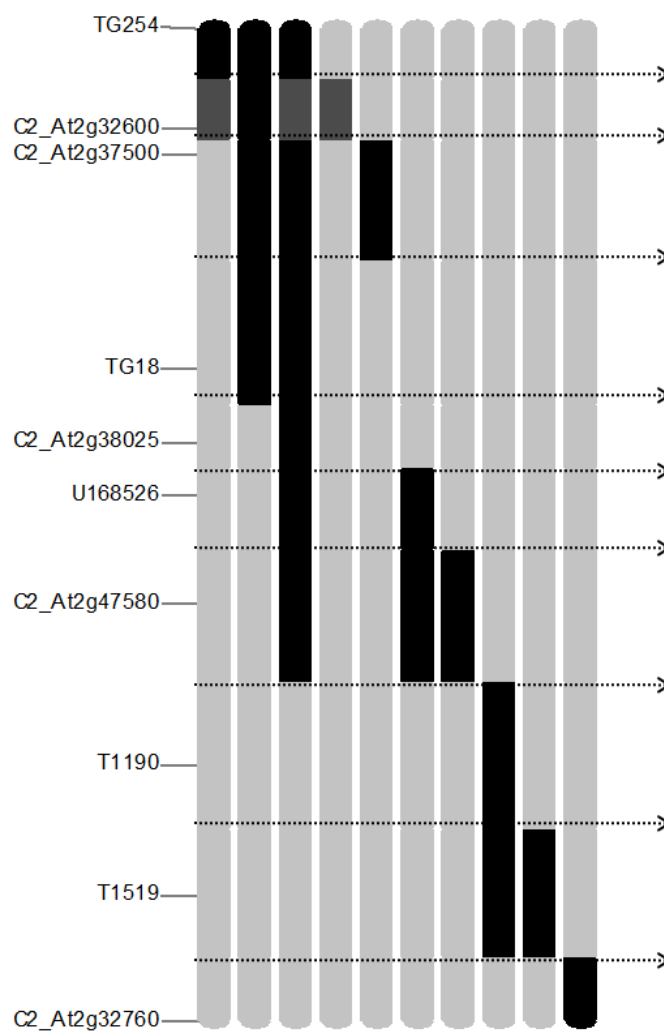

**Chromosome 9**

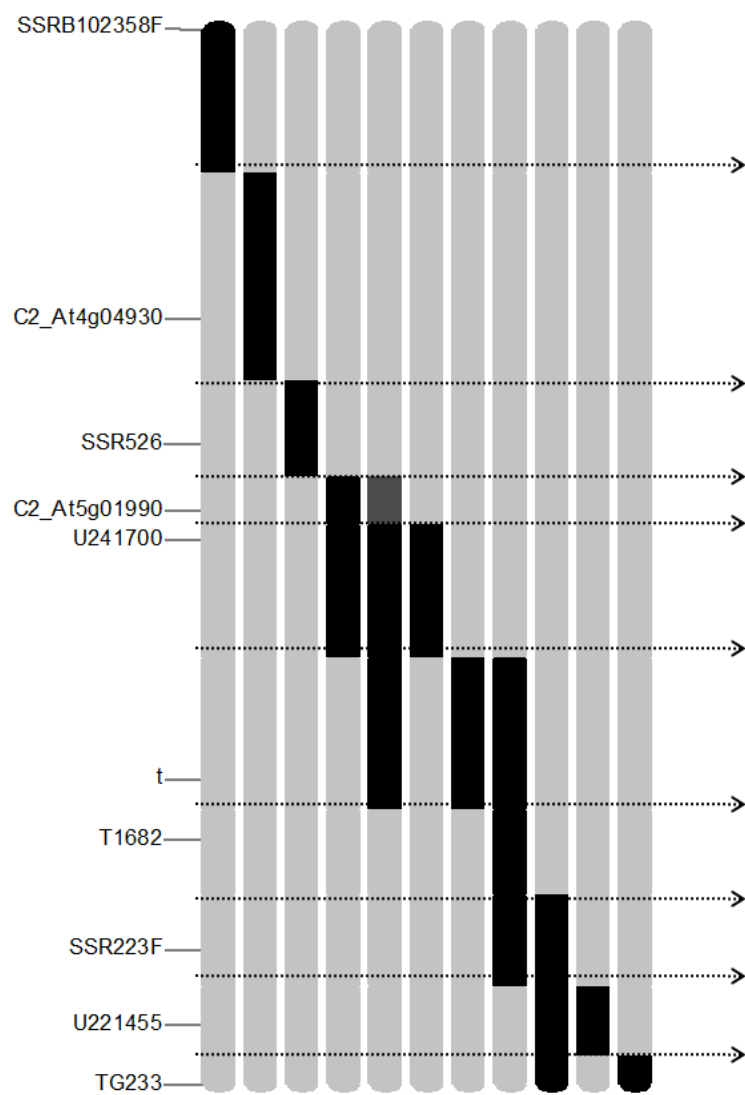

**Chromosome 10**

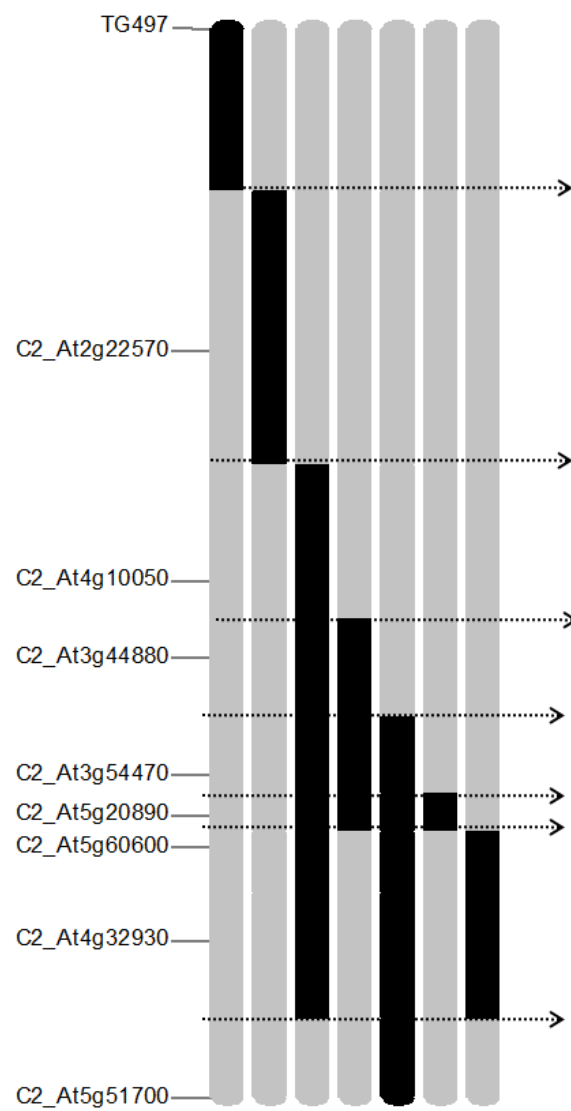

## Chromosome 11

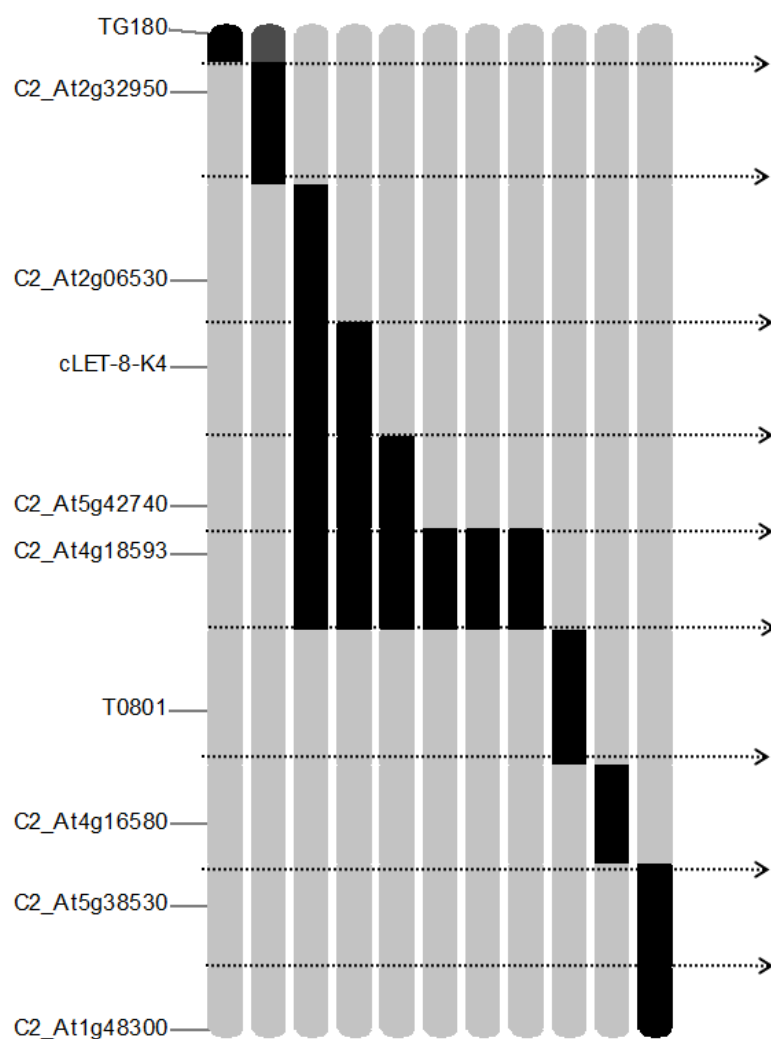

### Chromosome 12

**Figure S3** Linkage map of selected chromosome segments introgressed from the wild donor (segments labelled by grey shadow), *S. pennellii* LA0716, to the recurrent parent (segments labelled with slash lines), *S. lycopersicum* 1052 for introgression lines construction.
